# Supplementary material for: Disease-specific longevity of impulse generators in deep brain stimulation and review of the literature
Source: Springer Nature journal article supplement (doi:10.1007/s00702-016-1562-1), 2016-05-19
Supplement: MOESM1 [file 10158260]

**Supplementary table 1. Longevity of IPG in stimulation modi across diseases and subtypes.**

| **Variable** | | **Target** | **IPGs (n)** | **Longevity in months* ± SEM** | **range** |
| --- | --- | --- | --- | --- | --- |
| A) | **Monopolar modus** |  | 68 | 51.2 ± 2.3 | 21 - 98 |
|  | **Bipolar modus** |  | 15 | 55.6 ± 7.3 | 16 - 110.5 |
|  | **Double monopolar modus** |  | 41 | 39.6 ± 3.1 | 12.5 - 103.3 |
| B) | **Monopolar modus in PD** | STN | 44 | 53.9 ± 2.9 | 22.7 - 98 |
|  | **Monopolar modus tremor-dominant** | STN | 11 | 46 ± 6.2 | 22.7 - 98 |
|  | **Monopolar modus akinetic-rigid** | STN | 12 | 63.2 ± 5.5 | 40.9 - 89 |
|  | **Monopolar modus balanced** | STN | 21 | 52.8 ± 3.8 | 26 - 85.5 |
|  | **Bipolar modus in PD** | STN | 10 | 69.2 ± 7.6 | 16.5 - 74.5 |
|  | **Double monoploar modus in PD** | STN | 14 | 35.9 ± 7.6 | 36 - 110.5 |
| C) | **Monopolar modus in dystonia** | GPi | 22 | 43 ± 3.5 | 21 - 84.5 |
|  | **Monopolar modus generalized** | GPi | 10 | 43.6 ± 6.1 | 24.2 - 84.5 |
|  | **Monopolar modus cervical-/ focal** | GPi | 4 | 46.3 ± 6.9 | 35 - 65.3 |
|  | **Monopolar modus segmental-/ axial** | GPi | 8 | 40.8 ± 5.2 | 21 - 58 |
|  | **Bipolar modus in dystonia** | GPi | 5 | 28.5 ± 5.6 | 16 - 44 |
|  | **Double monopolar modus in dystonia** | GPi | 26 | 40.7 ± 3.9 | 12.5 - 103.3 |
| D) | **Monopolar modus in ET** | VIM | 2 | 82.4 ± 0.9 | 81 - 83 |

**Legend: Statistics comprised Mann-Whitney-U-test**

***Double monopolar modus vs. monopolar modus p=0.002**

***Bipolar modus vs. double monopolar modus p=0.063**

***Bipolar modus in PD vs. double monopolar modus in PD p<0.003**

***Monopolar modus in PD vs. double monopolar modus in PD p<0.003**
